# Supplementary material for: Preparing a highly dispersed catalyst supported on mesoporous microspheres via the self-assembly of amphiphilic ligands for the recovery of ultrahigh concentration wastewater
Source: Royal Society of Chemistry journal article supplement (doi:10.1039/c6ta00884d), 2016-01-01
Supplement: c6ta00884d1.pdf [file c6ta00884d1.pdf]

## Preparing a highly dispersed catalyst supported on mesoporous microspheres via the self-assembly of amphiphilic ligands for the recovery of the ultrahigh concentration wastewater

Shengyang Tao,<sup>\*a</sup> Yandong Chen,<sup>a</sup> Huan Wang,<sup>a</sup> Jieshan Qiu<sup>b</sup> and Xinkui Wang<sup>a</sup>

- 
- a. School of Chemistry, Dalian University of Technology, Dalian, Liaoning, P. R. China. E-mail: taosy@dlut.edu.cn; Fax: +86-411-84986035; Tel: +86-411-84986035
- b. Carbon Research Laboratory, Liaoning Key Lab for Energy Materials and Chemical Engineering, State Key Lab of Fine Chemicals, School of Chemical Engineering, Dalian University of Technology, Dalian, Liaoning, P. R. China

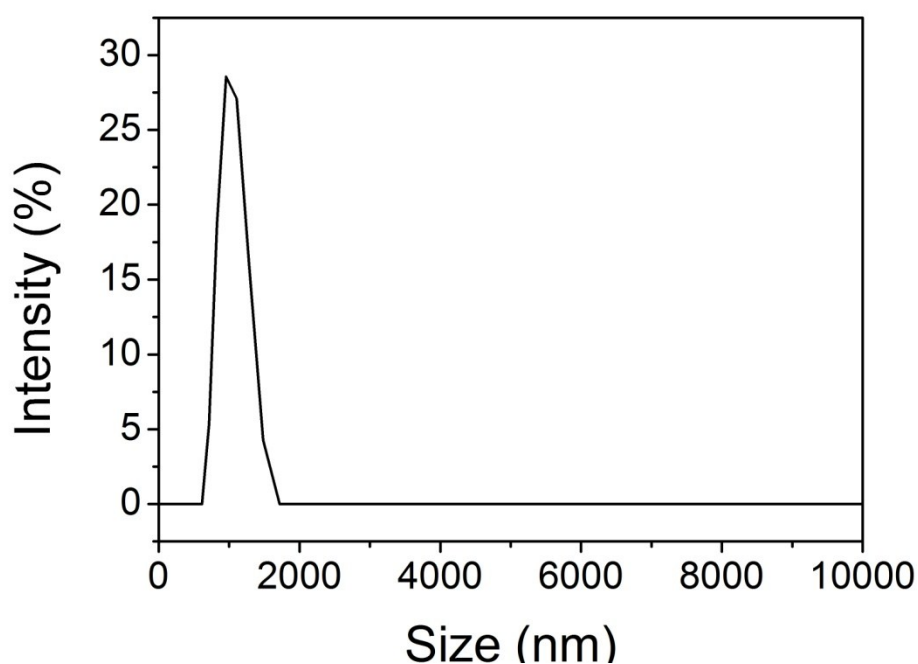

**Fig. S1** Size distribution of the synthesized mesoporous microspheres.

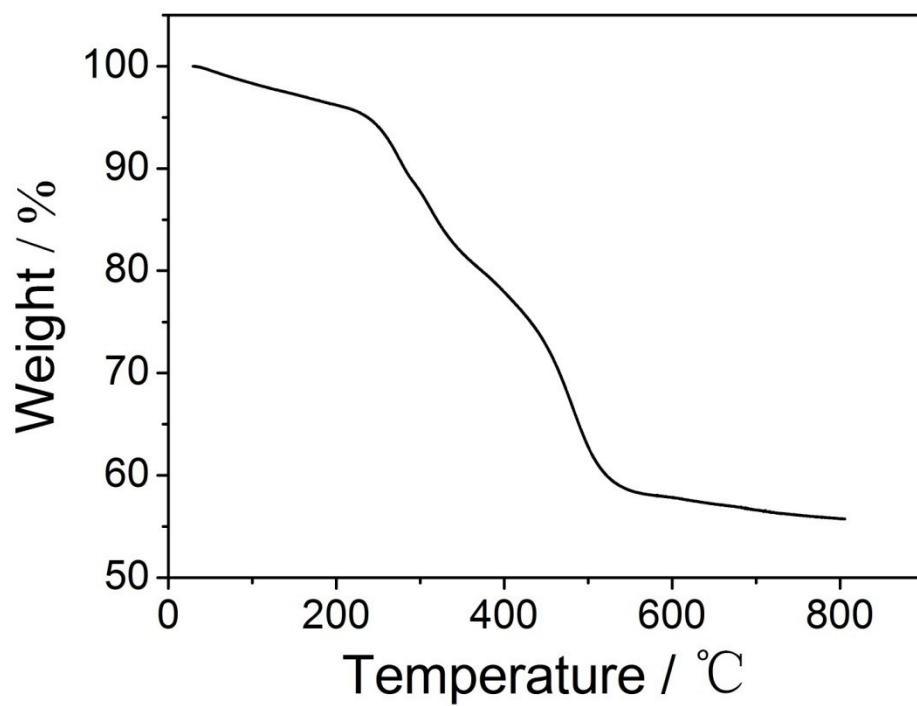

**Fig. S2** TGA curve of the as-synthesized mesoporous microspheres.

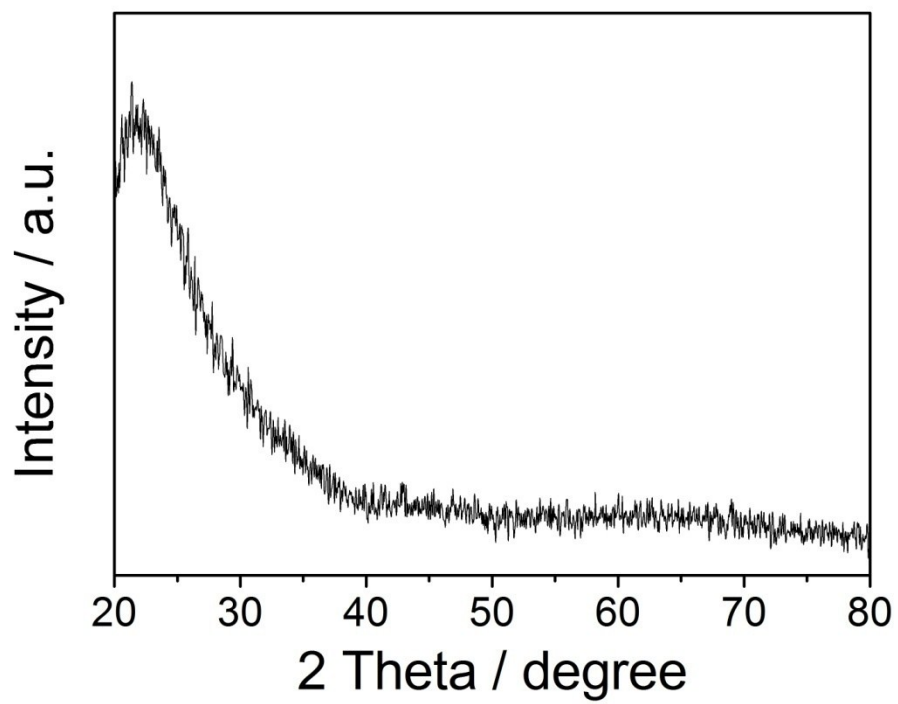

**Fig. S3** Wide-angle XRD pattern of Fe @ MSM.
